# Supplementary material
Source: PubMed Central journal article supplement (PMC4689138)

Vehicle

Liver

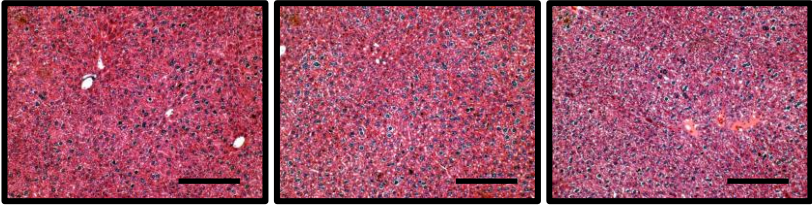

Kidney

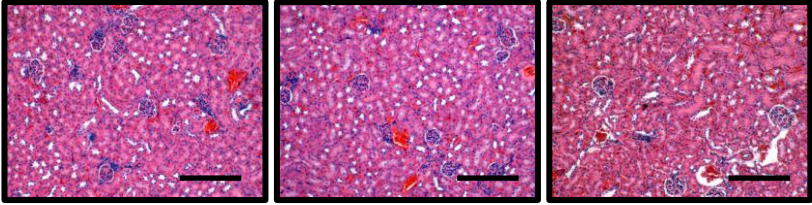

DMH1

Liver

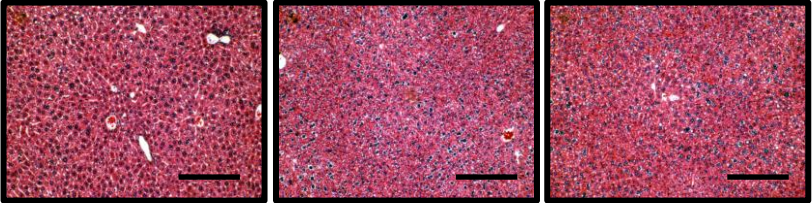

Kidney

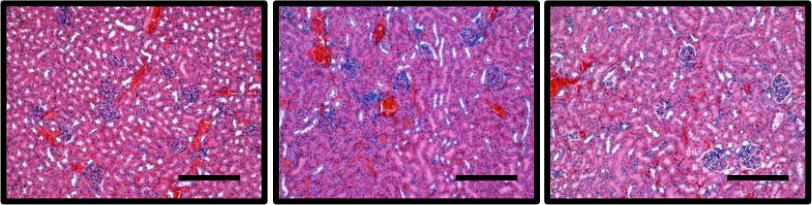

# Supplemental Figure 3. Moses

a) Primary tumor size

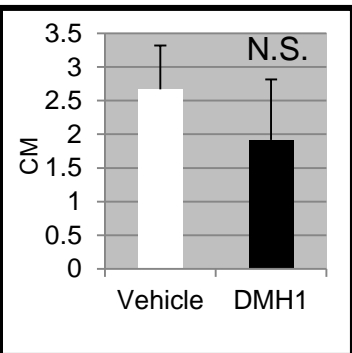

b) Burden

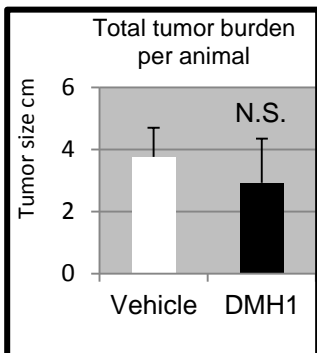

c) Vehicle

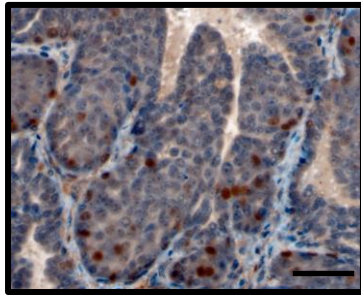

d) DMH1

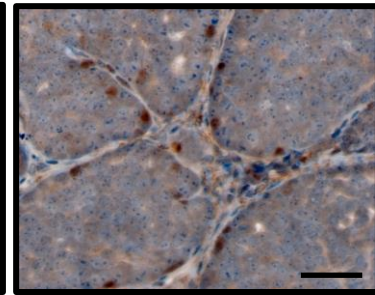

e) qPCR for luminal vs. basal epithelial cells

$\Delta$ Np63

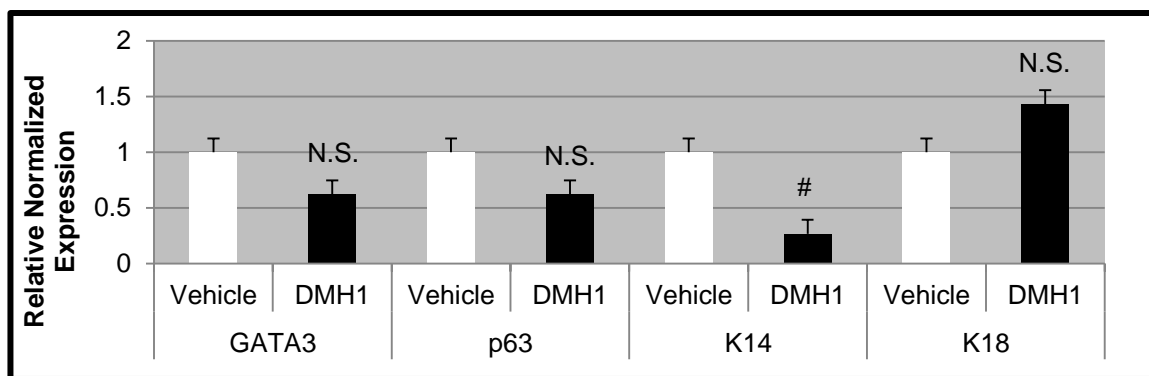

f) qPCR for EMT/Stem

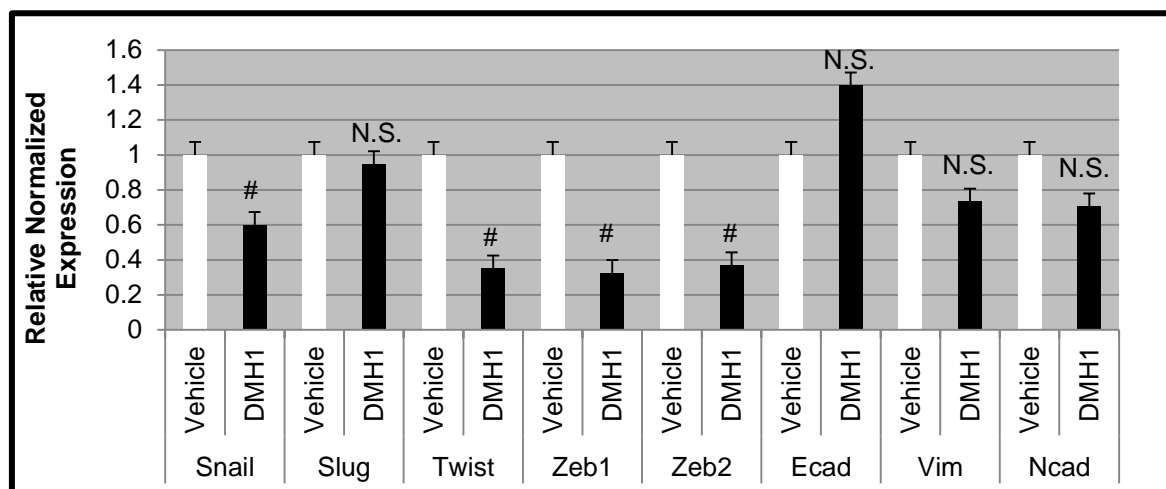

g) Vehicle

h) DMH1

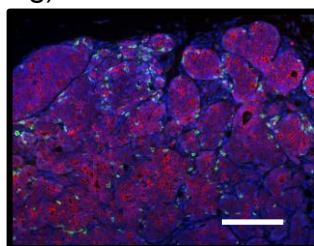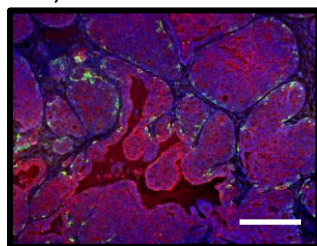

i) Vehicle

j) DMH1

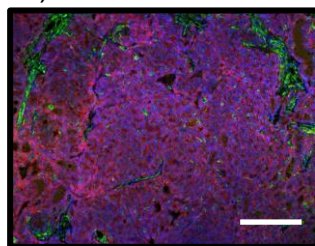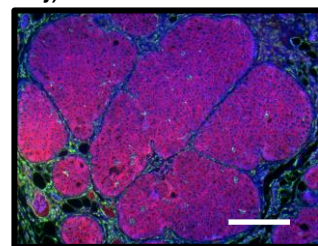

K5/K8-18/DAPI

Ecadherin/Vimentin/DAPI

# Supplemental Figure 4. Moses

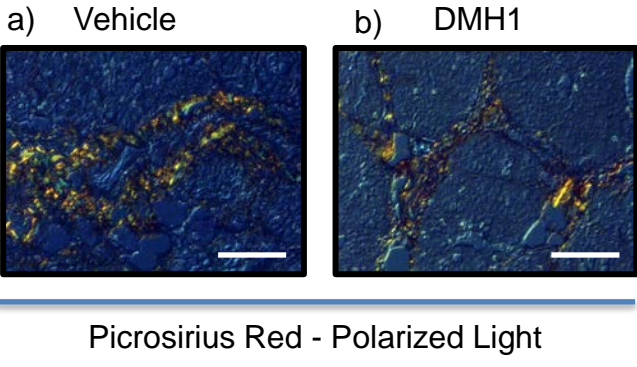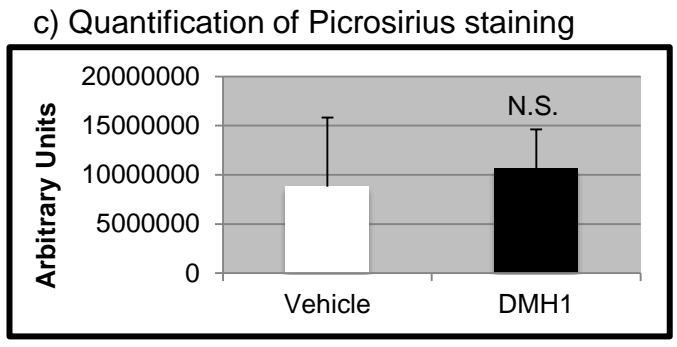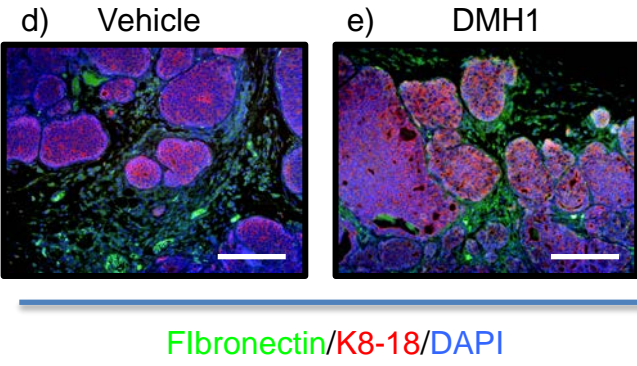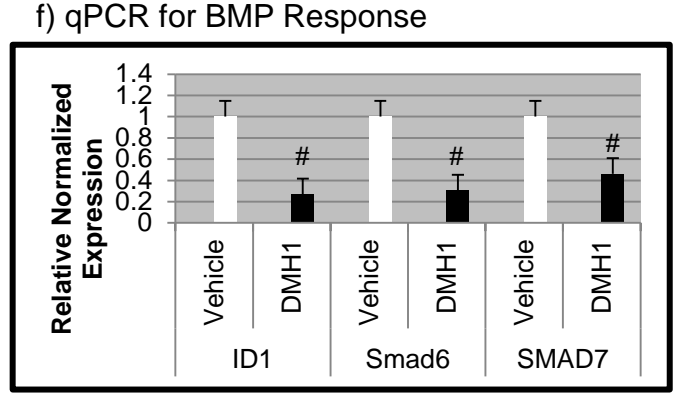

## g) *in vitro* scratch migration assay

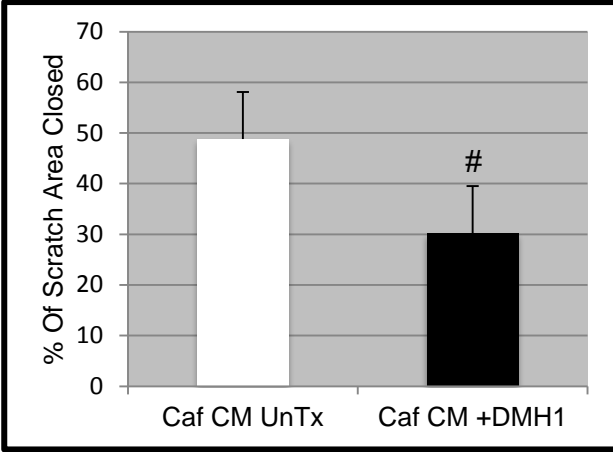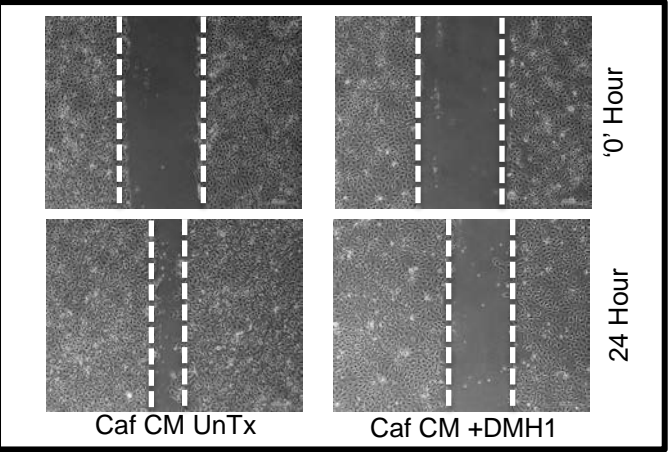

## h) qPCR from DMH1 inhibition in human CAFs *in vitro*

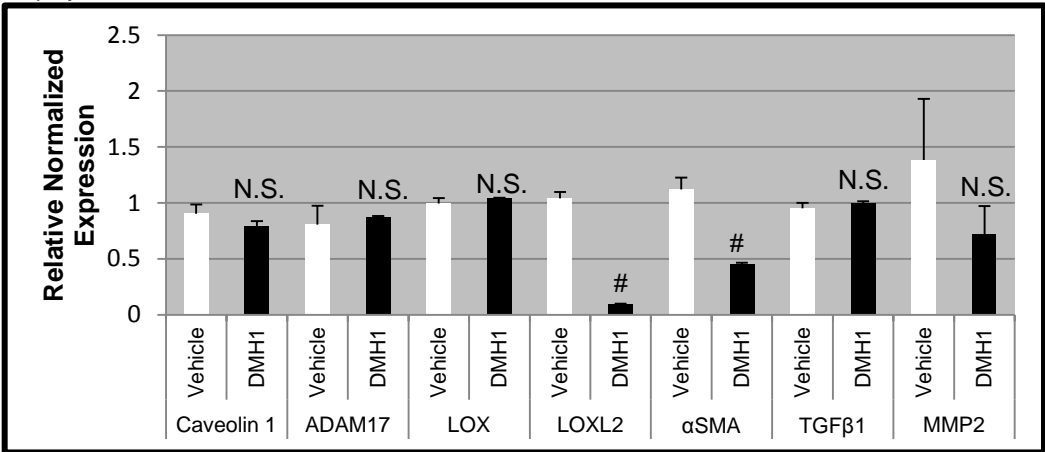



# Supplemental Figure 5. Moses

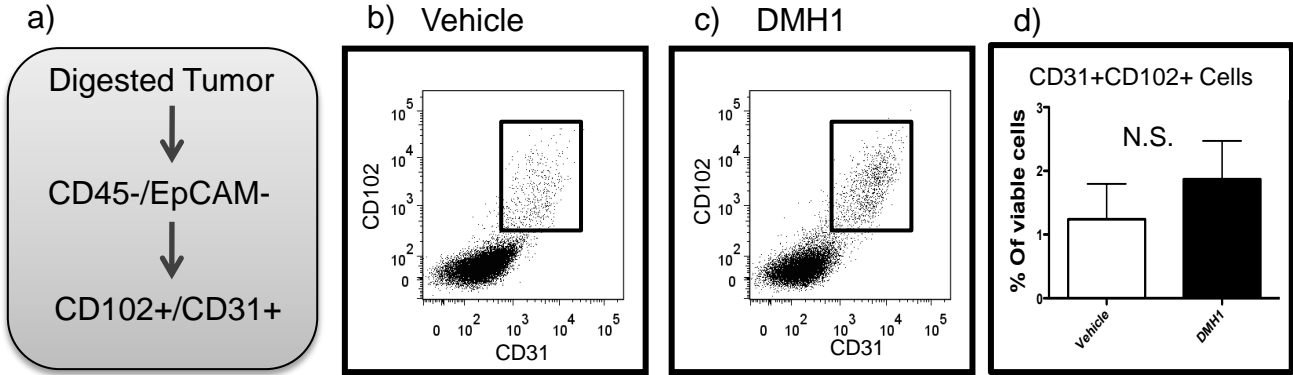

## e) qPCR for BMP Response

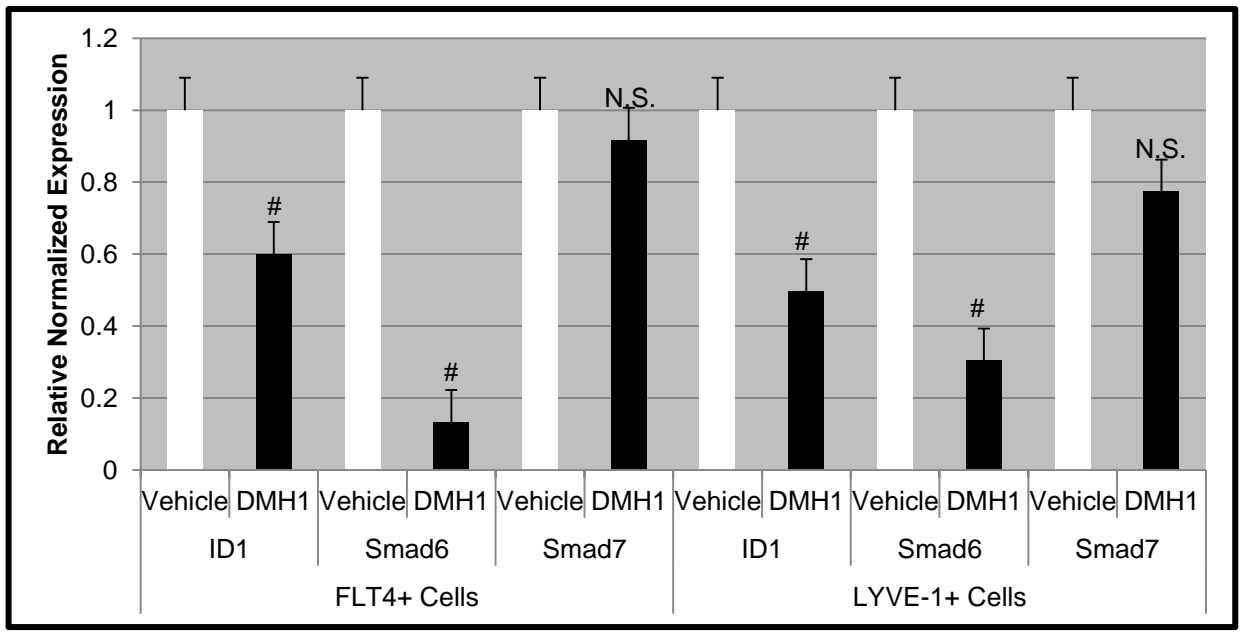

# Supplemental Figure 6. Moses

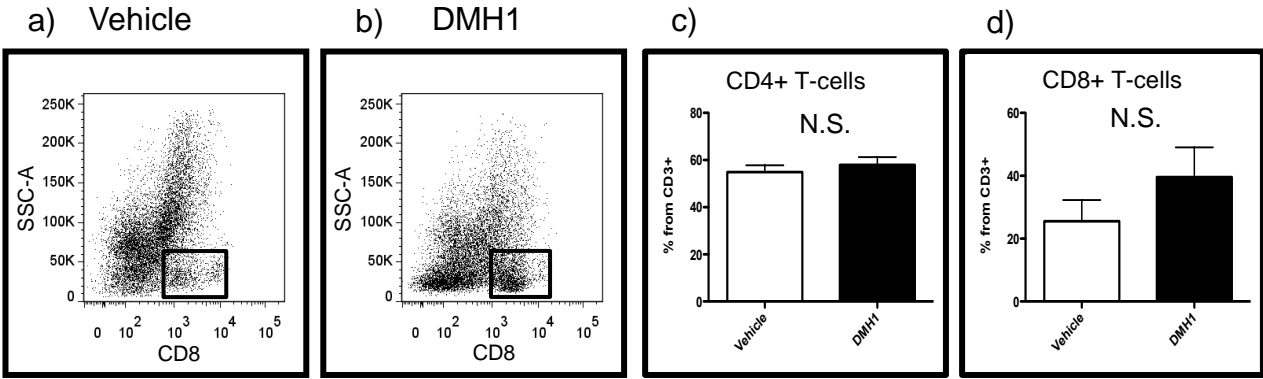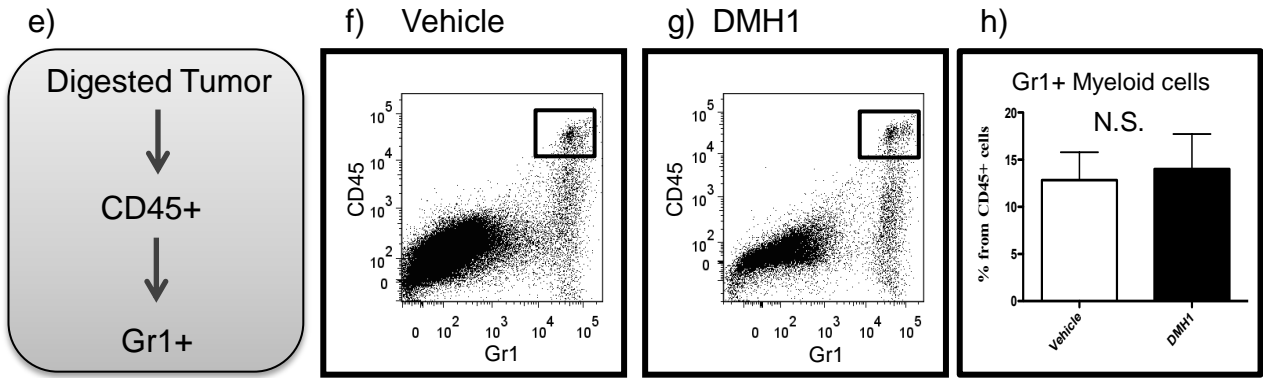

## i) qPCR for Gr-1+ Cells

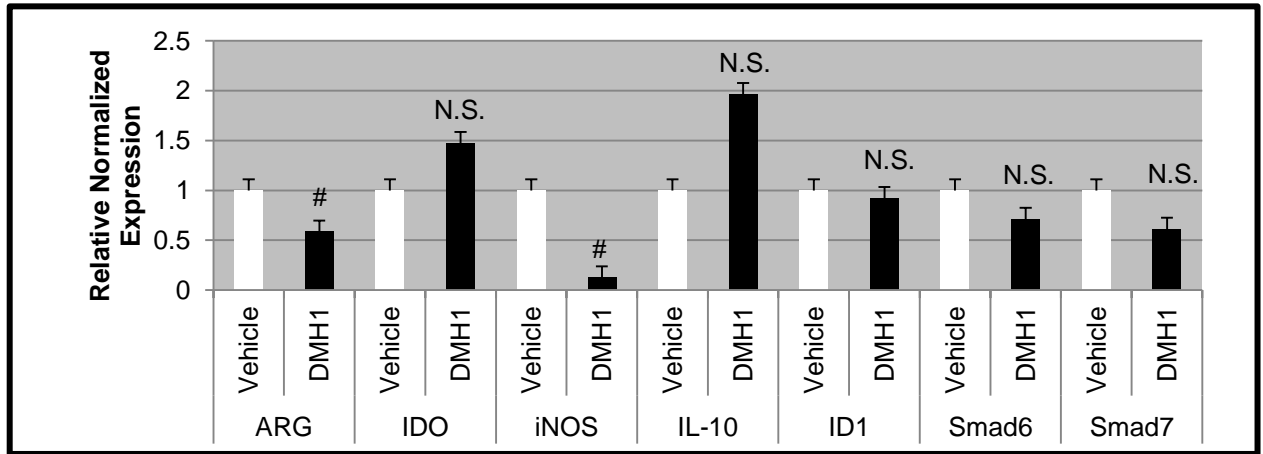

Supplement: NIHMS744594-supplement-2.pdf [file NIHMS744594-supplement-2.pdf]
